# Supplementary material for: Iron(iii) and nickel(ii) complexes as potential anticancer agents: synthesis, physicochemical and structural properties, cytotoxic activity and DNA interactions
Source: Royal Society of Chemistry journal article supplement (doi:10.1039/c5nj00594a), 2015-01-01
Supplement: c5nj00594a1.pdf [file c5nj00594a1.pdf]

**New Journal of Chemistry**

Electronic Supporting Information of

Iron(III) and Ni(II) complexes as potential anticancer agents: Synthesis,  
physicochemical and structural properties, cytotoxic activity and DNA  
interactions

Tülay Bal-Demirci <sup>a,\*</sup>, Gulsah Congur <sup>b</sup>, Arzum Erdem <sup>b,\*</sup>, Serap Erdem-Kuruca <sup>c,\*</sup>,  
Namık Özdemir <sup>d,\*</sup>, Kadriye Akgün-Dar <sup>e</sup>, Başak Varol <sup>f</sup>, and Bahri Ülküseven <sup>a</sup>

<sup>a</sup> Department of Chemistry, Engineering Faculty, İstanbul University, 34320, Avcılar, İstanbul, Turkey

<sup>b</sup> Ege University, Faculty of Pharmacy, Analytical Chemistry Department, 35100, Bornova, İzmir, Turkey

<sup>c</sup> Department of Physiology, İstanbul Medical Faculty, İstanbul University, 34093, Çapa, İstanbul, Turkey

<sup>d</sup> Department of Physics, Faculty of Arts and Sciences, Ondokuz Mayıs University, 55139, Samsun, Turkey

<sup>e</sup> Department of Biology, İstanbul Science Faculty, İstanbul University, Beyazıt 34134, İstanbul, Turkey

<sup>f</sup> Department of Biophysic, İstanbul Medical Faculty, İstanbul University, 34093, Çapa, İstanbul, Turkey

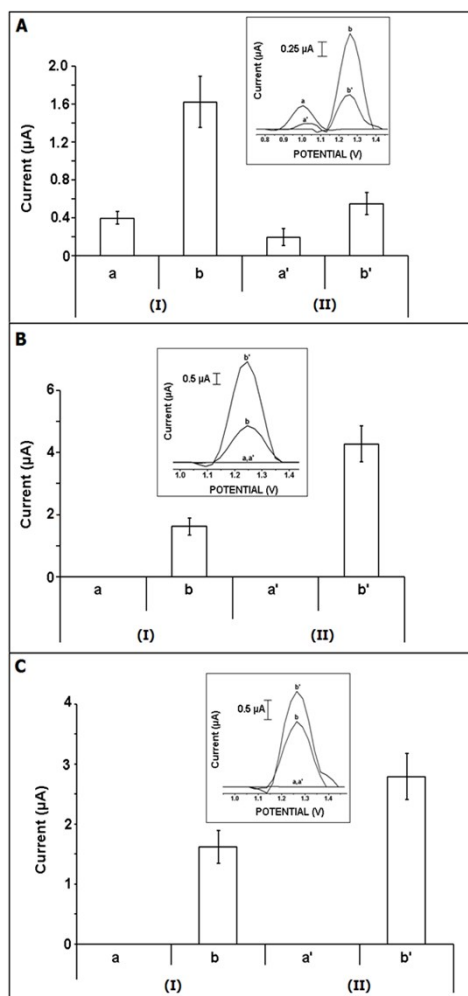

**Fig. S1.** Histograms and voltammograms as insets representing the oxidation signals of compound **1** measured at +0.990 V (**a**, **a'**), and adenine measured at +1.2 V (**b**, **b'**) obtained before (**I**) and after (**II**) interaction between 0.1 μg/mL compound **1** and 10 μg/mL poly (dA).poly (dT) (**A**); the oxidation signals of compound **2** measured at +0.782 V and +1.012 V (**a**,**a'**) and adenine (**b**,**b'**) obtained before (**I**) and after (**II**) interaction between 0.1 μg/mL compound **2** and 10 μg/mL poly (dA).poly (dT) (**B**); the oxidation signals of compound **3** (**a**,**a'**) and adenine (**b**,**b'**) obtained before (**I**) and after (**II**) interaction between 0.1 μg/mL compound **3** and 10 μg/mL poly (dA).poly (dT) (**C**) on the PGE surface by using DPV.

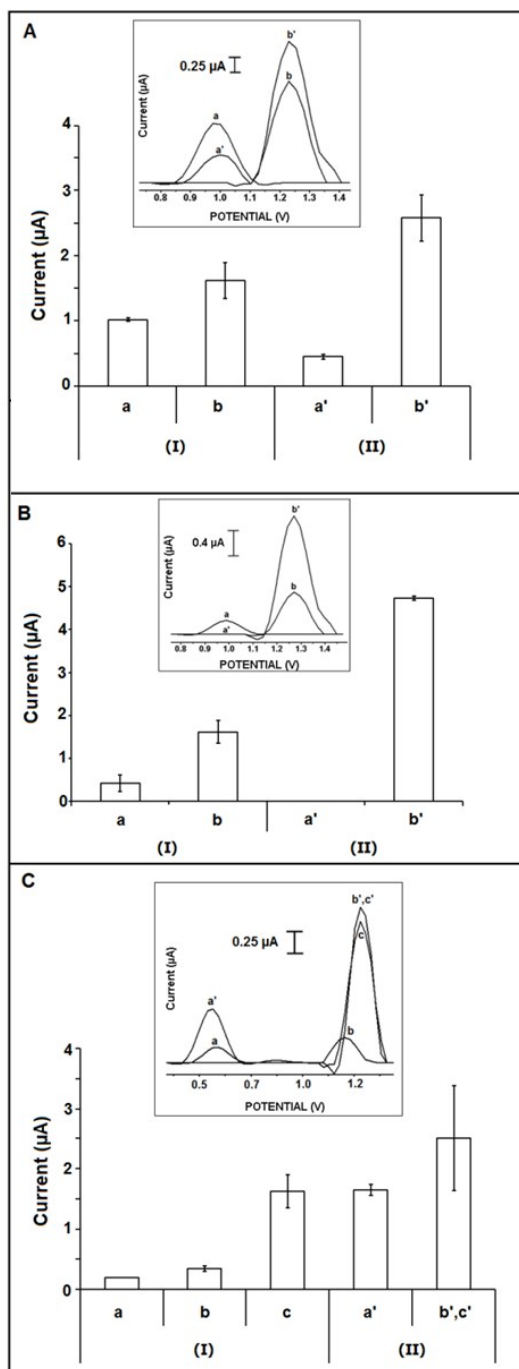

**Fig. S2.** Histograms and voltammograms as insets representing the oxidation signals of compound **1** (**a**, **a'**), and adenine (**b**, **b'**) obtained before (**I**) and after (**II**) interaction between 1 µg/mL compound **1** and 10 µg/mL poly (dA).poly (dT) (**A**); the oxidation signals of compound **2** (**a**,**a'**) and adenine (**b**,**b'**) obtained before (**I**) and after (**II**) interaction between 1 µg/mL compound **2** and 10 µg/mL poly (dA).poly (dT) (**B**); the oxidation signals of compound **3** measured at +0.557 V (**a**,**a'**), +1.168 V (**b**,**b'**) and adenine (**c**,**c'**) obtained before (**I**) and after (**II**) interaction between 1 µg/mL compound **3** and 10 µg/mL poly (dA).poly (dT) (**C**) onto PGE surface by using DPV.
